# Supplementary material for: Prediction of Potential Seagrass Habitat Using Remote Sensing Big Data and Machine Learning
Source: Preprints.org preprint supplement (doi:10.20944/preprints202209.0221.v1), 2022-09-15
Supplement: Supplementary file 1 [file supplementary]

Article

Predicting potential seagrass habitats based on remote sensing big data and hybrid machine learning models

Bohao He1, †, Yanghe Zhao1, †, Shahid Ahmad1, Mao Wei1, *

1 College of Ecology and Environment, Hainan University, Hainan 570100, China;

20095132210054@hainanu.edu.cn (B.H.); zyh15525152637@163.com (Y.Z.)

* Correspondence: maowei@hainanu.edu.cn (M.W.)

† These authors contributed equally to this work.

**Appendix A**

**
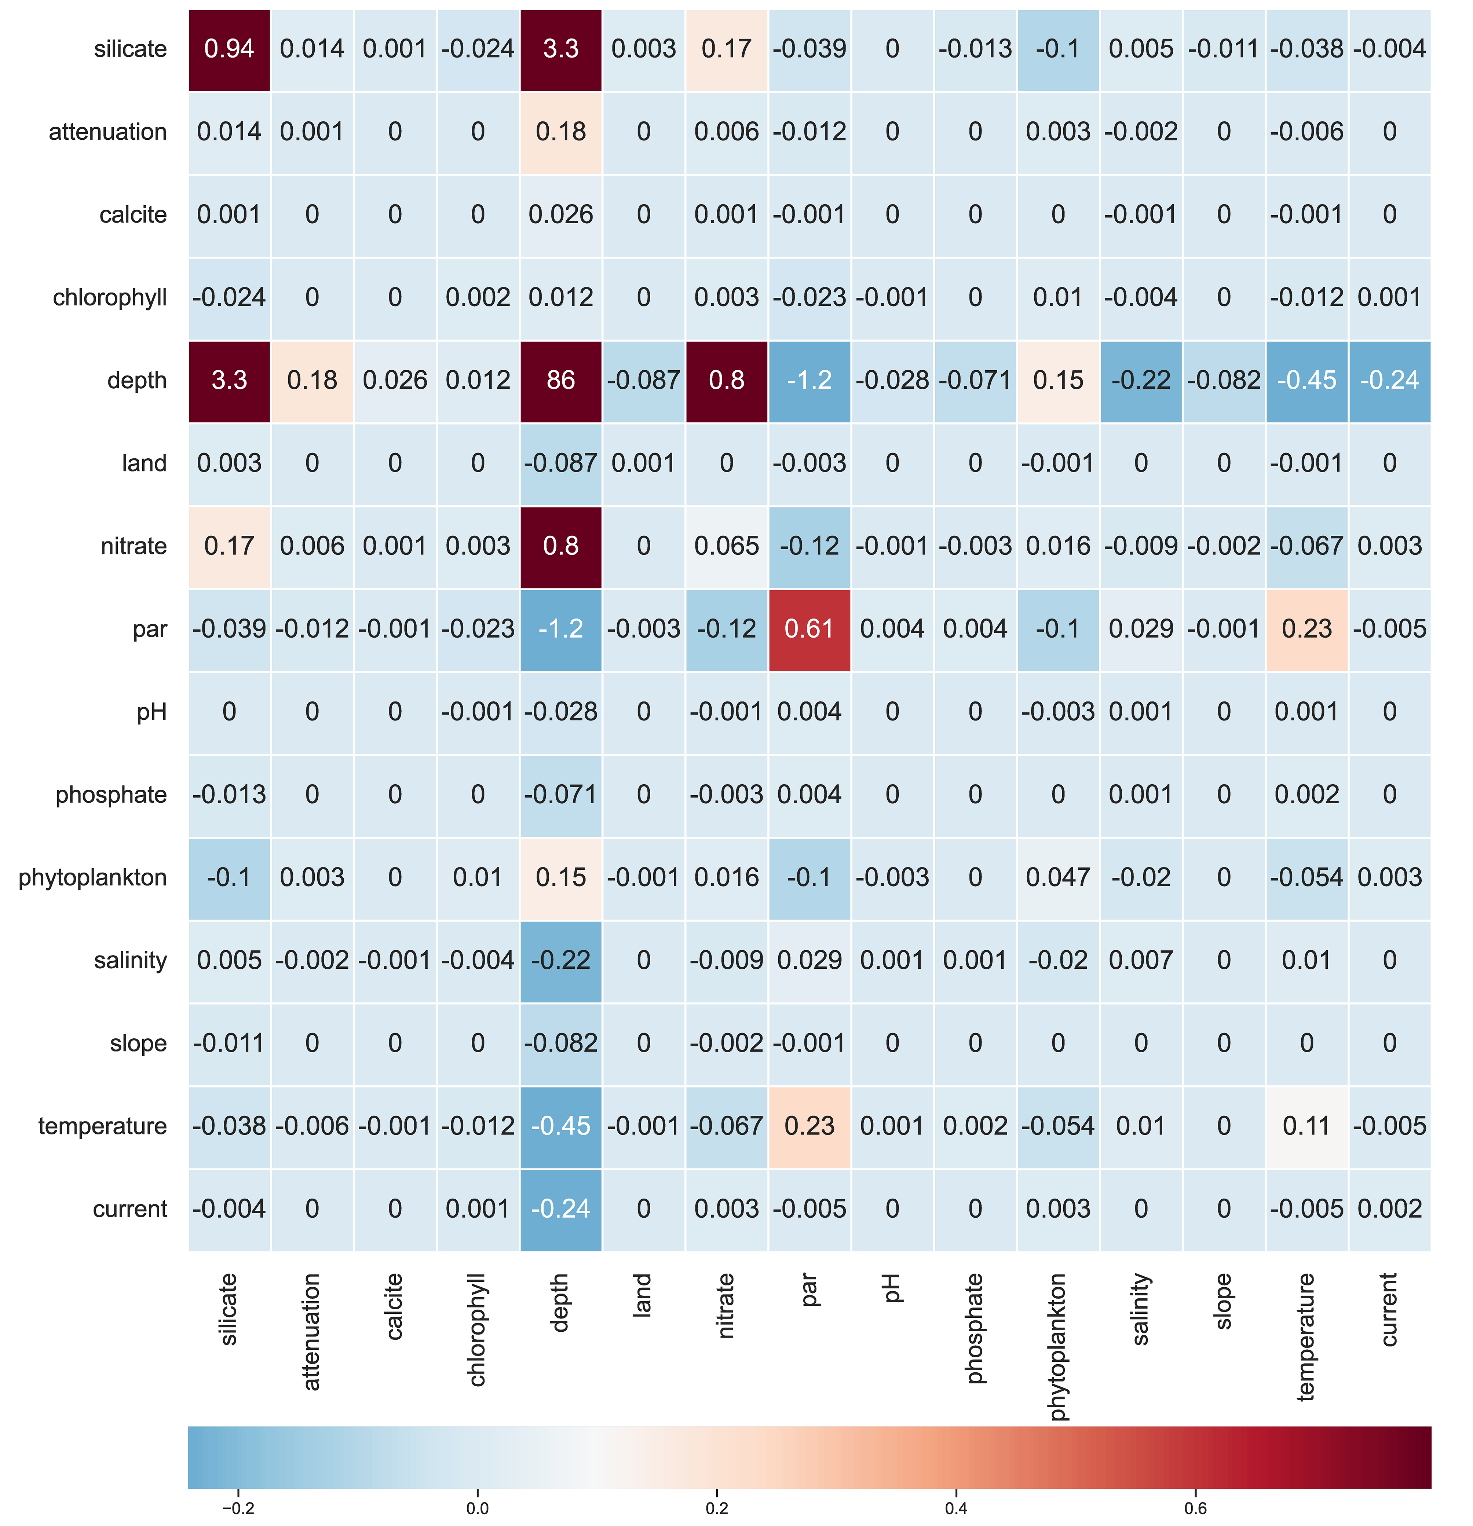
**

**Figure A1.** Covariance matrix of 15 environmental variables.
